# Supplementary material
Source: Springer Nature journal article supplement (https://www.springermedizin.de/resource/supplementary/13046_2011_513_MOESM5_ESM.pdf/9662402)

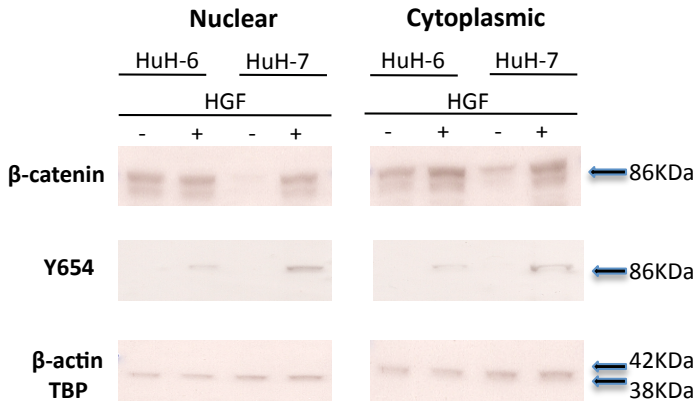

Supplement: MOESM5 [file 9662402]
